# Supplementary material
Source: HighWire-hosted journal article supplement (https://erj.ersjournals.com/content/56/5/2000132)
Supplement: inline-supplementary-material-1 [file inline-supplementary-material-1.pdf]

## Supplementary material

**Table S1.** Diagnoses in children with suspected asthma after visiting the clinic\* N=514

|                                                    | Diagnoses |      |
|----------------------------------------------------|-----------|------|
|                                                    | n (%)     |      |
| <b>Definite diagnoses</b>                          |           |      |
| Asthma                                             | 259       | (50) |
| Cough not due to asthma <sup>1</sup>               | 71        | (14) |
| Exercise limitation not due to asthma <sup>2</sup> | 56        | (11) |
| Allergic rhinoconjunctivitis                       | 11        | (2)  |
| Non-CF bronchiectasis                              | 1         | (<1) |
| <b>Probable diagnoses</b>                          |           |      |
| Asthma                                             | 97        | (19) |
| Exercise limitation not due to asthma <sup>2</sup> | 19        | (4)  |

\*Diagnosis at the first visit at a follow up visit within 3 months if the diagnosis was unclear

<sup>1</sup> Recurrent colds, post infectious cough, habitual cough, etc.

<sup>2</sup> Inducible laryngeal obstruction, dysfunctional breathing, functional symptoms, etc.

**Table S2.** Proportion of patients who performed diagnostic tests\* per centre N=514

| Diagnostic tests               | Centres         |                  |                 |                 |                 |                 | Total       |
|--------------------------------|-----------------|------------------|-----------------|-----------------|-----------------|-----------------|-------------|
|                                | A<br>N=60<br>n% | B<br>N=196<br>n% | C<br>N=83<br>n% | D<br>N=75<br>n% | E<br>N=15<br>n% | F<br>N=85<br>n% | N=514<br>n% |
| Any allergy test <sup>1</sup>  | 60 (100)        | 182 (93)         | 74 (89)         | 55 (73)         | 15 (100)        | 81 (95)         | 467 (91)    |
| FeNO                           | 60 (100)        | 185 (94)         | 81 (98)         | 75 (100)        | 15 (100)        | 85 (100)        | 501 (97)    |
| Spirometry                     | 60 (100)        | 196 (100)        | 83 (100)        | 75 (100)        | 15 (100)        | 85 (100)        | 514 (100)   |
| Body plethysmography           | 59 (98)         | 171 (87)         | 52 (63)         | 61 (81)         | 10 (67)         | 79 (93)         | 432 (84)    |
| Bronchodilator reversibility   | 29 (48)         | 145 (74)         | 61 (73)         | 68 (91)         | 15 (100)        | 63 (74)         | 381 (74)    |
| Any bronchial provocation test | 13 (22)         | 86 (44)          | 23 (28)         | 23 (31)         | 7 (47)          | 58 (68)         | 210 (41)    |
| Methacholine                   | 7 (12)          | 71 (36)          | 2 (2)           | 1 (1)           | -               | 48 (56)         | 129 (25)    |
| Exercise                       | 7 (12)          | 18 (9)           | 21 (25)         | 22 (29)         | 5 (33)          | 12 (14)         | 85 (17)     |
| Mannitol                       | -               | -                | -               | -               | 3 (20)          | -               | 3 (1)       |

\*At the first visit or at a follow up visit within 3 months

<sup>1</sup>Allergy test either done as above or results from <6 months ago reported in referral letter.

**Table S3.** Diagnostic test results in patients with and without asthma N=514

| Diagnostic tests                      | Asthma                   |             |                         |            |                          |            |
|---------------------------------------|--------------------------|-------------|-------------------------|------------|--------------------------|------------|
|                                       | Definite asthma<br>N=259 |             | Probable asthma<br>N=97 |            | Other diagnosis<br>N=158 |            |
|                                       | median (IQR)             |             | median (IQR)            |            | median (IQR)             |            |
| Any allergy test, n(%)                | 248                      | (96)        | 93                      | (95)       | 124                      | (79)       |
| ≥1 positive test n(%)                 | 201                      | (74)        | 59                      | (61)       | 52                       | (36)       |
| Number of positive tests <sup>1</sup> | 2                        | (1-3)       | 1                       | (0-3)      | 0                        | (0-2)      |
| FeNO, n(%)                            | 227                      | (88)        | 77                      | (80)       | 134                      | (84)       |
| Parts per billion                     | 25                       | (12-50)     | 14                      | (8-28)     | 11                       | (7-18)     |
| Spirometry, n(%)                      | 253                      | (98)        | 90                      | (93)       | 152                      | (96)       |
| FEV1, z-scores                        | -0.5                     | (-1.4-0.1)  | -0.2                    | (-1.0-0.5) | 0.1                      | (-0.6-0.8) |
| FEV1/FVC                              | 82                       | (76-88)     | 90                      | (84-95)    | 88                       | (84-93)    |
| FEF50, z-score                        | -0.8                     | (-1.4--0.1) | 0.1                     | (-0.7-0.9) | 0.2                      | (-0.4-0.9) |
| Bodyplethysmography, n(%)             | 197                      | (76)        | 73                      | (75)       | 117                      | (74)       |
| sReff, kPa·s <sup>2</sup>             | 1.0                      | (0.8-1.3)   | 0.8                     | (0.7-0.9)  | 0.8                      | (0.6-0.9)  |
| sRtot, kPa·s <sup>3</sup>             | 1.3                      | (1.1-1.8)   | 1.4                     | (1.3-1.5)  | 1.1                      | (1.0-1.3)  |
| RV/TLC                                | 30                       | (25-36)     | 30                      | (26-36)    | 29                       | (24-34)    |
| Bronchodilator reversibility, n(%)    | 215                      | (83)        | 59                      | (60)       | 92                       | (59)       |
| Increase in FEV1 in %                 | 13                       | (6-25)      | 10                      | (1-26)     | 6                        | (2-18)     |

<sup>1</sup>Defined as wheal size ≥3mm for mites, cat, grass, birch, mugwort and alternaria skin prick test and as ≥0.35kU/L for specific IgE test

<sup>2</sup> Reported by 4 centres

<sup>3</sup> Reported by 2 centres

**Table S4.** Diagnostic accuracy of diagnostic tests to diagnose asthma N=514 (sensitivity analysis: where children with “probable asthma” are subsumed to those with “no asthma” instead of those with “no asthma”)

|                            | A+T+ | A-T+ | A+T- | A-T- | Sens         | Spec         | PPV          | NPV          | YI   | AUC  |
|----------------------------|------|------|------|------|--------------|--------------|--------------|--------------|------|------|
|                            | n    | n    | n    | n    | %<br>(95%CI) | %<br>(95%CI) | %<br>(95%CI) | %<br>(95%CI) |      |      |
| <b>Clinical tests</b>      |      |      |      |      |              |              |              |              |      |      |
| Allergy test <sup>1</sup>  |      |      |      |      |              |              |              |              |      | 0.67 |
| ≥1 positive test*          | 201  | 111  | 47   | 108  | 81 (76-86)   | 49 (43-56)   | 64 (59-70)   | 70 (62-77)   | 0.30 |      |
| ≥2 positive tests          | 154  | 79   | 94   | 140  | 62 (56-68)   | 64 (57-70)   | 66 (60-72)   | 60 (53-66)   | 0.26 |      |
| FeNO                       |      |      |      |      |              |              |              |              |      | 0.70 |
| ≥20ppb                     | 130  | 58   | 97   | 153  | 58 (51-64)   | 73 (66-78)   | 69 (62-76)   | 61 (55-67)   | 0.30 |      |
| ≥21ppb                     | 127  | 53   | 100  | 158  | 56 (49-63)   | 75 (68-81)   | 71 (63-77)   | 61 (55-67)   | 0.31 |      |
| ≥23ppb*                    | 119  | 44   | 108  | 167  | 52 (46-59)   | 79 (73-84)   | 73 (66-80)   | 61 (55-67)   | 0.32 |      |
| ≥25ppb                     | 114  | 41   | 113  | 170  | 50 (44-57)   | 81 (75-86)   | 74 (66-80)   | 60 (54-66)   | 0.31 |      |
| Spirometry                 |      |      |      |      |              |              |              |              |      |      |
| FEV1                       |      |      |      |      |              |              |              |              |      | 0.64 |
| ≤-0.2 z-score*             | 159  | 102  | 94   | 139  | 63 (57-69)   | 58 (51-64)   | 61 (55-67)   | 60 (53-66)   | 0.21 |      |
| ≤-0.7 z-score              | 111  | 67   | 142  | 174  | 44 (38-50)   | 72 (66-78)   | 62 (55-69)   | 55 (49-61)   | 0.16 |      |
| ≤-1.0 z-score              | 87   | 45   | 166  | 196  | 34 (29-41)   | 81 (76-86)   | 66 (57-74)   | 54 (49-59)   | 0.16 |      |
| FEV1/FVC                   |      |      |      |      |              |              |              |              |      | 0.72 |
| <80%                       | 107  | 28   | 141  | 203  | 43 (37-50)   | 88 (83-92)   | 79 (71-86)   | 59 (54-64)   | 0.31 |      |
| <84%*                      | 153  | 54   | 95   | 177  | 62 (55-68)   | 77 (71-82)   | 74 (67-80)   | 65 (59-71)   | 0.38 |      |
| <90%                       | 202  | 127  | 46   | 104  | 81 (76-86)   | 45 (38-52)   | 61 (56-67)   | 69 (61-77)   | 0.26 |      |
| FEF50                      |      |      |      |      |              |              |              |              |      | 0.73 |
| ≤-0.5 z-score*             | 131  | 46   | 87   | 155  | 60 (53-67)   | 77 (71-83)   | 74 (67-80)   | 64 (58-70)   | 0.37 |      |
| ≤-1.0 z-score              | 83   | 27   | 135  | 174  | 38 (32-45)   | 87 (81-91)   | 75 (66-83)   | 56 (51-62)   | 0.25 |      |
| Bodyplethysm.              |      |      |      |      |              |              |              |              |      |      |
| sReff                      |      |      |      |      |              |              |              |              |      | 0.68 |
| ≥0.9 kPa-s*                | 98   | 45   | 68   | 122  | 59 (51-67)   | 73 (66-80)   | 69 (60-76)   | 64 (57-71)   | 0.32 |      |
| ≥1.0 kPa-s                 | 81   | 33   | 85   | 134  | 49 (41-57)   | 80 (73-86)   | 71 (62-79)   | 61 (54-68)   | 0.29 |      |
| sRtot                      |      |      |      |      |              |              |              |              |      | 0.64 |
| ≥1.0 kPa-s                 | 28   | 18   | 4    | 6    | 88 (71-96)   | 25 (10-47)   | 61 (45-75)   | 60 (26-88)   | 0.13 |      |
| ≥1.1 kPa-s *               | 25   | 14   | 7    | 10   | 78 (60-91)   | 42 (22-63)   | 64 (47-79)   | 59 (33-82)   | 0.20 |      |
| RV/TLC                     |      |      |      |      |              |              |              |              |      | 0.53 |
| ≥25%*                      | 150  | 134  | 45   | 52   | 77 (70-83)   | 28 (22-35)   | 53 (47-59)   | 54 (43-64)   | 0.05 |      |
| Bronchodilator rev.        |      |      |      |      |              |              |              |              |      | 0.60 |
| FEV <sub>1</sub>           |      |      |      |      |              |              |              |              |      |      |
| ≥7% increase*              | 156  | 75   | 59   | 76   | 73 (66-78)   | 50 (42-59)   | 68 (61-74)   | 56 (47-65)   | 0.23 |      |
| ≥10% increase              | 131  | 66   | 84   | 85   | 61 (54-67)   | 56 (48-64)   | 66 (59-73)   | 50 (43-58)   | 0.17 |      |
| ≥12% increase              | 117  | 62   | 98   | 89   | 54 (48-61)   | 59 (51-67)   | 65 (58-72)   | 48 (40-55)   | 0.13 |      |
| Bronchodilator rev. if     |      |      |      |      |              |              |              |              |      | 0.70 |
| FEV1/FVC <80% <sup>4</sup> |      |      |      |      |              |              |              |              |      |      |
| ≥7% increase*              | 83   | 10   | 18   | 14   | 82 (73-89)   | 58 (37-78)   | 89 (81-95)   | 44 (26-62)   | 0.41 |      |
| ≥10% increase              | 68   | 8    | 33   | 16   | 67 (57-76)   | 67 (45-84)   | 89 (80-95)   | 33 (20-48)   | 0.34 |      |
| ≥12% increase              | 60   | 7    | 41   | 17   | 59 (49-69)   | 71 (49-87)   | 90 (80-96)   | 29 (18-43)   | 0.30 |      |

A+T+: children with asthma diagnosis and positive test result, A-T+: children without asthma diagnosis but positive test result, A+T-: children with asthma diagnosis but negative test result, A-T-: children without asthma and negative test result, Sens: sensitivity, Spec: specificity, PPV: positive predictive value, NPV: negative predictive value, YI: Youden's-Index: Sensitivity + Specificity -1, AUC: area under the curve, FeNO: fractional exhaled nitric oxide, ppb: parts per billion, FEV<sub>1</sub>: forced expiratory volume in 1 second, FVC: forced vital capacity, FEF50: forced expiratory flow at 50% of FVC, sReff: specific effective airway resistance, sRtot: specific total airway resistance, RV: residual volume, TLC: total lung capacity, Bronchodilator rev.: bronchodilator reversibility  
Displayed cut-offs chosen based on proposed cut-offs from previous publications

\*Cut-off with maximum combined sensitivity and specificity (highest Youden's-Index)

<sup>1</sup> Number allergens for which the skin prick test is positive: wheal size  $\geq 3$  or the specific IgE test was positive:  $\geq 0.35$  kU/l.

<sup>2</sup> Reported by 4 centres

<sup>3</sup> Reported by 2 centres

<sup>4</sup> N= 126, cut-off chosen based on proposed cut-off from previous publications and guidelines

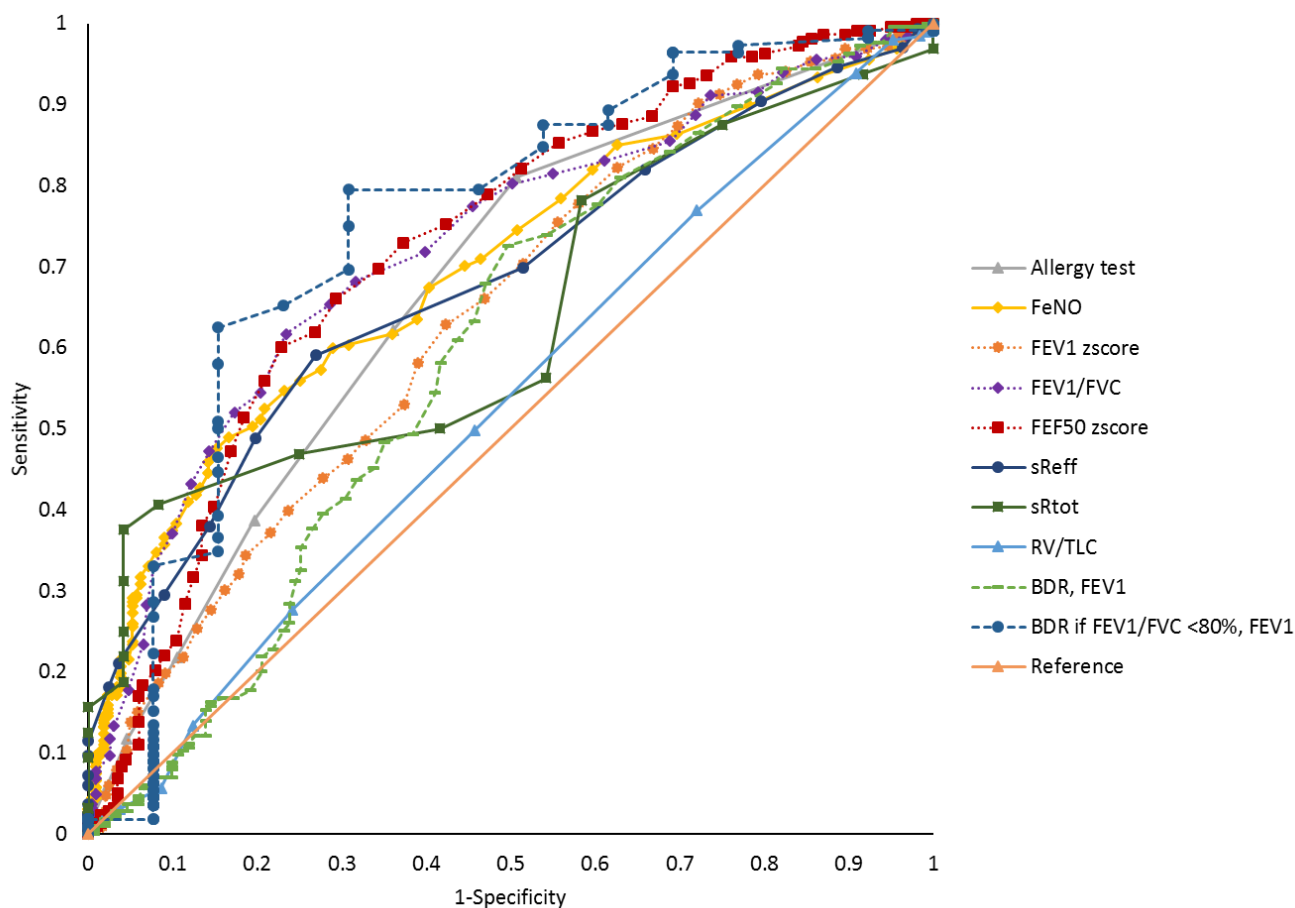

**Figure S1** Receiver operating characteristics (ROC) curve of clinical tests to diagnose asthma. (Sensitivity analysis: “asthma” is defined as definite asthma and “not asthma” is defined as probable asthma or other diagnosis)

\* Cut-off with maximum combined sensitivity and specificity

| Test                                                 | Unit                                                   |
|------------------------------------------------------|--------------------------------------------------------|
| Allergy test npos                                    | increase of 1 positive skin prick or specific IgE test |
| FeNO                                                 | increase of 1 parts per billion (ppb)                  |
| FEV1                                                 | increase of 0.1 z-score                                |
| FEV1/FVC                                             | increase of 1%                                         |
| FEF50                                                | increase of 0.1 z-score                                |
| sReff                                                | decrease of 0.01 kPa·s                                 |
| sRtot                                                | decrease of 0.01 kPa·s                                 |
| RV/TLC                                               | increase of 5%                                         |
| Bronchodilator reversibility (BDR), FEV <sub>1</sub> | increase of 1% in FEV <sub>1</sub>                     |

**Table S5.** Diagnostic test results in steroid naive patients with and without asthma N=271

| Diagnostic tests                      | Asthma                   |            |                         |            |                          |            |
|---------------------------------------|--------------------------|------------|-------------------------|------------|--------------------------|------------|
|                                       | Definite asthma<br>N=108 |            | Probable asthma<br>N=48 |            | Other diagnosis<br>N=115 |            |
|                                       | median (IQR)             |            | median (IQR)            |            | median (IQR)             |            |
| Any allergy test, n(%)                | 101                      | (94)       | 46                      | (96)       | 86                       | (75)       |
| ≥1 positive test n(%)                 | 87                       | (81)       | 31                      | (65)       | 39                       | (34)       |
| Number of positive tests <sup>1</sup> | 2                        | (1-4)      | 1                       | (0-3)      | 0                        | (0-2)      |
| FeNO, n(%)                            | 90                       | (83)       | 42                      | (88)       | 98                       | (85)       |
| Parts per billion                     | 33                       | (13-54)    | 17                      | (8-31)     | 13                       | (7-20)     |
| Spirometry, n(%)                      | 102                      | (94)       | 46                      | (96)       | 112                      | (97)       |
| FEV1, z-scores                        | -0.5                     | (-1.3-0.1) | -0.1                    | (-1.0-0.5) | 0.1                      | (-0.6-0.9) |
| FEV1/FVC                              | 82                       | (77-88)    | 89                      | (83-92)    | 89                       | (86-95)    |
| FEF50, z-score                        | -0.7                     | (-1.4-0.1) | 0.1                     | (-0.7-0.9) | 0.2                      | (-0.2-0.9) |
| Bodyplethysmography, n(%)             | 80                       | (74)       | 36                      | (75)       | 88                       | (77)       |
| sReff, kPa·s <sup>2</sup>             | 1.0                      | (0.7-1.3)  | 0.8                     | (0.7-0.9)  | 0.8                      | (0.6-0.9)  |
| sRtot, kPa·s <sup>3</sup>             | 1.3                      | (1.1-2.3)  | 1.4                     | (1.3-1.5)  | 1.0                      | (1.0-1.2)  |
| RV/TLC                                | 28                       | (24-33)    | 29                      | (25-37)    | 30                       | (24-34)    |
| Bronchodilator reversibility, n(%)    | 85                       | (79)       | 30                      | (63)       | 66                       | (57)       |
| Increase in FEV1 in %                 | 13                       | (6-25)     | 5                       | (2-19)     | 7                        | (2-28)     |

<sup>1</sup>Defined as wheal size ≥3mm for mites, cat, grass, birch, mugwort and alternaria skin prick test and as ≥0.35kU/L for specific IgE test

<sup>2</sup> Reported by 4 centres

<sup>3</sup> Reported by 2 centres

**Table S6.** Diagnostic accuracy of diagnostic tests to diagnose asthma N=271 (sensitivity analysis: in steroid naïve children)

|                                                      | A+T+ | A-T+ | A+T- | A-T- | Sens       | Spec       | PPV        | NPV        | YI   | AUC  |
|------------------------------------------------------|------|------|------|------|------------|------------|------------|------------|------|------|
|                                                      | n    | n    | n    | n    | %          | %          | %          | %          |      |      |
|                                                      |      |      |      |      | (95%CI)    | (95%CI)    | (95%CI)    | (95%CI)    |      |      |
| <b>Clinical tests</b>                                |      |      |      |      |            |            |            |            |      |      |
| Allergy test <sup>1</sup>                            |      |      |      |      |            |            |            |            |      | 0.71 |
| ≥1 positive test*                                    | 118  | 39   | 29   | 47   | 80 (73-86) | 55 (44-65) | 75 (68-82) | 62 (50-73) | 0.35 |      |
| ≥2 positive tests                                    | 90   | 26   | 57   | 60   | 61 (53-69) | 70 (59-79) | 78 (69-85) | 51 (42-61) | 0.31 |      |
| FeNO                                                 |      |      |      |      |            |            |            |            |      | 0.71 |
| ≥20ppb                                               | 75   | 25   | 57   | 73   | 57 (48-65) | 74 (65-83) | 75 (65-83) | 56 (47-65) | 0.31 |      |
| ≥21ppb                                               | 72   | 23   | 60   | 75   | 55 (46-63) | 77 (67-85) | 76 (66-84) | 56 (47-64) | 0.31 |      |
| ≥23ppb                                               | 69   | 17   | 63   | 81   | 52 (43-51) | 83 (74-90) | 80 (70-88) | 56 (48-64) | 0.35 |      |
| ≥25ppb                                               | 66   | 15   | 66   | 83   | 50 (41-59) | 85 (76-91) | 81 (71-89) | 56 (47-64) | 0.35 |      |
| ≥28ppb*                                              | 62   | 11   | 70   | 87   | 47 (38-56) | 89 (81-94) | 85 (75-92) | 55 (47-63) | 0.36 |      |
| Spirometry                                           |      |      |      |      |            |            |            |            |      |      |
| FEV1                                                 |      |      |      |      |            |            |            |            |      | 0.65 |
| ≤-0.2 z-score                                        | 83   | 44   | 65   | 68   | 56 (48-64) | 61 (51-70) | 65 (56-74) | 51 (42-60) | 0.17 |      |
| ≤-0.7 z-score*                                       | 60   | 23   | 88   | 89   | 41 (33-49) | 79 (71-87) | 72 (61-82) | 50 (43-58) | 0.20 |      |
| ≤-1.0 z-score                                        | 42   | 17   | 106  | 95   | 28 (21-36) | 85 (77-91) | 71 (58-82) | 47 (40-54) | 0.13 |      |
| FEV1/FVC                                             |      |      |      |      |            |            |            |            |      | 0.69 |
| <80%                                                 | 47   | 6    | 100  | 99   | 32 (25-40) | 94 (88-98) | 87 (77-96) | 50 (43-57) | 0.26 |      |
| <86%*                                                | 88   | 26   | 59   | 79   | 60 (51-68) | 75 (66-83) | 77 (68-85) | 57 (49-66) | 0.35 |      |
| <90%                                                 | 109  | 58   | 38   | 47   | 74 (66-81) | 45 (35-56) | 65 (58-72) | 55 (44-66) | 0.19 |      |
| FEF50                                                |      |      |      |      |            |            |            |            |      | 0.70 |
| ≤-0.3 z-score*                                       | 70   | 18   | 61   | 77   | 53 (45-62) | 81 (72-88) | 80 (70-87) | 56 (47-64) | 0.34 |      |
| ≤-1.0 z-score                                        | 40   | 5    | 91   | 90   | 31 (23-39) | 95 (88-98) | 89 (76-96) | 50 (42-57) | 0.25 |      |
| Bodyplethysm.                                        |      |      |      |      |            |            |            |            |      |      |
| sReff                                                |      |      |      |      |            |            |            |            |      | 0.62 |
| ≥0.9 kPa·s*                                          | 47   | 20   | 54   | 55   | 47 (37-57) | 73 (62-83) | 70 (58-81) | 50 (41-60) | 0.20 |      |
| ≥1.0 kPa·s                                           | 37   | 15   | 64   | 60   | 37 (27-47) | 80 (69-88) | 71 (57-83) | 48 (39-58) | 0.17 |      |
| sRtot                                                |      |      |      |      |            |            |            |            |      | 0.77 |
| ≥1.0 kPa·s                                           | 13   | 7    | 2    | 6    | 87 (60-98) | 46 (19-75) | 65 (41-85) | 75 (35-97) | 0.33 |      |
| ≥1.5 kPa·s *                                         | 13   | 4    | 2    | 9    | 87 (60-98) | 69 (39-91) | 76 (50-93) | 82 (48-98) | 0.56 |      |
| RV/TLC                                               |      |      |      |      |            |            |            |            |      | 0.51 |
| ≥35%*                                                | 25   | 17   | 88   | 69   | 22 (15-31) | 80 (70-88) | 60 (43-74) | 44 (36-52) | 0.02 |      |
| Bronchodilator rev.                                  |      |      |      |      |            |            |            |            |      |      |
| FEV <sub>1</sub>                                     |      |      |      |      |            |            |            |            |      | 0.56 |
| ≥7% increase*                                        | 75   | 32   | 40   | 34   | 65 (56-74) | 52 (39-64) | 70 (60-79) | 46 (34-58) | 0.17 |      |
| ≥10% increase                                        | 66   | 27   | 49   | 39   | 57 (48-67) | 59 (46-71) | 71 (61-80) | 44 (34-55) | 0.16 |      |
| ≥12% increase                                        | 59   | 25   | 56   | 41   | 51 (42-61) | 62 (49-74) | 70 (59-80) | 42 (32-53) | 0.13 |      |
| Bronchodilator rev. if<br>FEV1/FVC <80% <sup>4</sup> |      |      |      |      |            |            |            |            |      | 0.87 |
| ≥7% increase                                         | 37   | 1    | 8    | 4    | 82 (68-92) | 80 (28-99) | 97 (86-99) | 33 (10-65) | 0.62 |      |
| ≥10% increase*                                       | 30   | 0    | 15   | 5    | 67 (51-80) | 99 (48-99) | 99 (88-99) | 25 (9-49)  | 0.67 |      |
| ≥12% increase                                        | 26   | 0    | 19   | 5    | 58 (42-72) | 99 (48-99) | 99 (87-99) | 21 (7-42)  | 0.58 |      |

A+T+: children with asthma diagnosis and positive test result, A-T+: children without asthma diagnosis but positive test result, A+T-: children with asthma diagnosis but negative test result, A-T-: children without asthma and negative test result, Sens: sensitivity, Spec: specificity, PPV: positive predictive value, NPV: negative predictive value, YI: Youden's-Index: Sensitivity + Specificity -1, AUC: area under the curve, FeNO: fractional exhaled nitric oxide, ppb: parts per billion, FEV<sub>1</sub>: forced expiratory volume in 1 second, FVC: forced vital capacity, FEF50: forced expiratory flow at 50% of FVC, sReff: specific effective airway resistance, sRtot: specific total airway resistance, RV: residual volume, TLC: total lung capacity,



Bronchodilator rev.: bronchodilator reversibility

Displayed cut-offs chosen based on proposed cut-offs from previous publications

\*Cut-off with maximum combined sensitivity and specificity (highest Youden's-Index)

<sup>1</sup> Number allergens for which the skin prick test is positive: wheal size  $\geq 3$  or the specific IgE test was positive:  $\geq 0.35$  kU/l.

<sup>2</sup> Reported by 4 centres

<sup>3</sup> Reported by 2 centres

<sup>4</sup> N= 51, cut-off chosen based on proposed cut-off from previous publications and guidelines

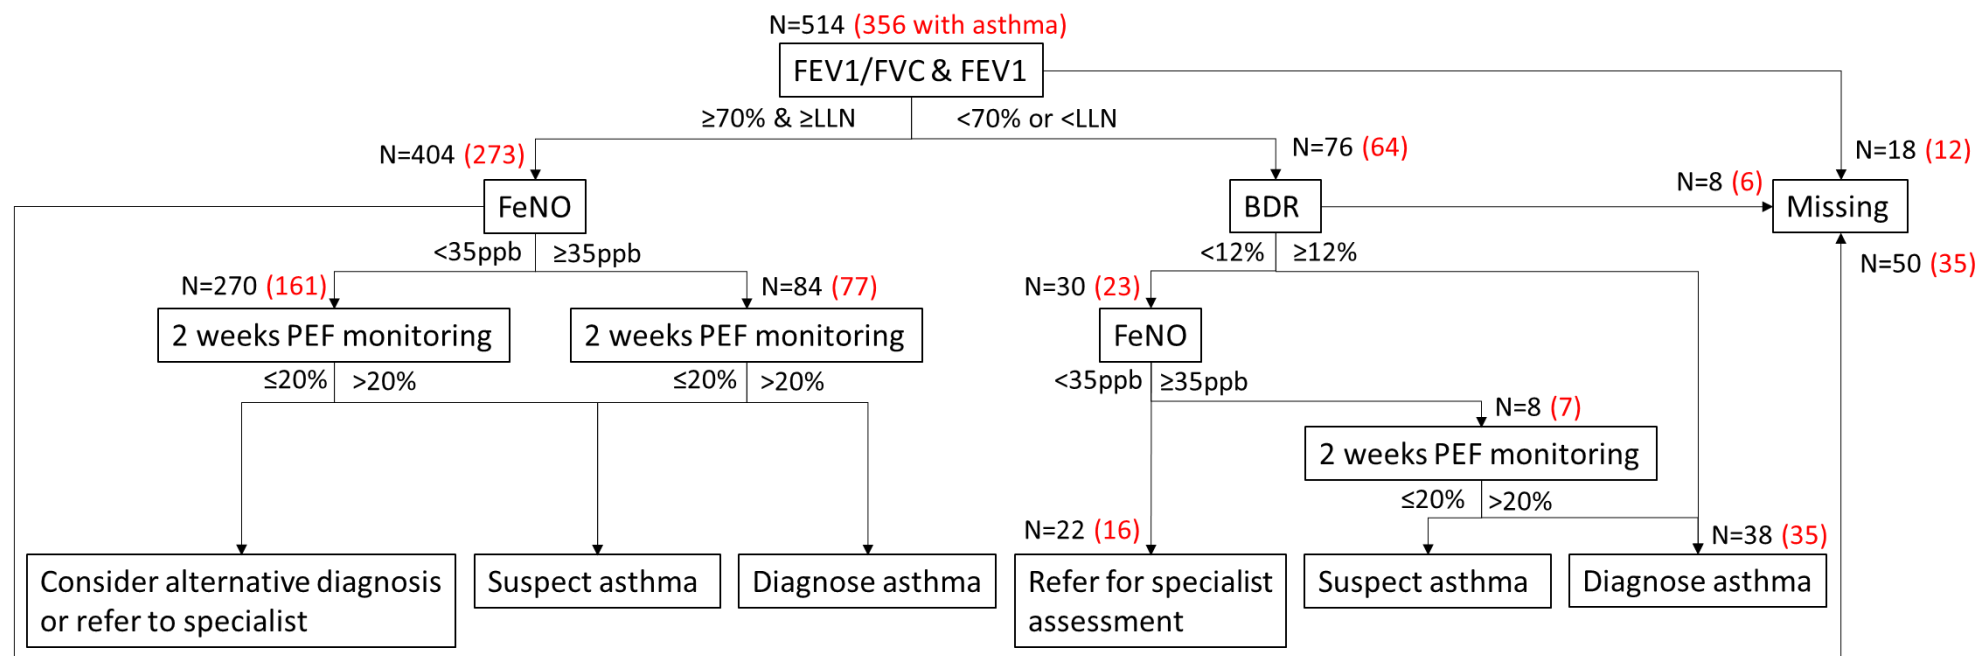

|             | Asthma + | Asthma - | Total |
|-------------|----------|----------|-------|
| Algorithm + | 35       | 3        | 38    |
| Algorithm - | 16       | 6        | 22    |
| Total       | 51       | 9        | 60    |

Sens =  $35/51 = 0.69$   
 Spec =  $6/9 = 0.67$   
 PPV =  $35/38 = 0.92$   
 NPV =  $6/22 = 0.27$

**Figure S2** Diagnostic accuracy of the diagnostic algorithm proposed by the NICE guideline

Numbers in black: number of patients at this step. Numbers in red: number of patients with doctor diagnosed asthma at this step. Algorithm +: diagnose asthma or suspect asthma. Algorithm - : refer for specialist assessment or consider alternative diagnosis. FEV1: forced expiratory volume in 1 second. FVC: forced vital capacity. BDR: bronchodilator reversibility. FeNO: fractional exhaled nitric oxide. PEF: peak expiratory flow.

\*362 patients would need 2 weeks PEF monitoring.
